# Supplementary material for: In situ synergistic reduced graphene oxide-boron carbon nitride nanosheet heterostructures for high-performance fabric-based supercapacitors
Source: Royal Society of Chemistry journal article supplement (doi:10.1039/d4cc01370k), 2024-01-01
Supplement: d4cc01370k1.pdf [file d4cc01370k1.pdf]

# In-situ synergistic reduced graphene oxide-boron carbon nitride nanosheets heterostructure for high-performance fabric-based supercapacitors

Yujiao Zhang <sup>a</sup>, Qitao Huang <sup>a</sup>, Liangliang Zhou <sup>b</sup>, Heng Liu<sup>a</sup>, Cai-Feng Wang,<sup>a</sup>  
Liangliang Zhu<sup>\*,a</sup>, and Su Chen<sup>\*,a</sup>

<sup>a</sup>State Key Laboratory of Materials-Oriented Chemical Engineering, College of Chemical Engineering, Jiangsu Key Laboratory of Fine Chemicals and Functional Polymer Materials, Nanjing Tech University, Nanjing 210009, P. R. China, E-mail: lzhu@njtech.edu.cn, chensu@njtech.edu.cn.

<sup>b</sup>School of Chemistry and Chemical Engineering, Nanjing University of Science and Technology Nanjing 210094, P. R. China.

## Materials and Methods

### Materials:

Ultra-pure boron powder (99.99%), urea (99.5%), glucose (99.5%), N, N-dimethylformamide (DMF), polyacrylonitrile (PAN) and poly (vinyl alcohol) (PVA) were obtained from Aladdin Chemical Reagent Co., Ltd. (Shanghai, China). Potassium permanganate (KMnO<sub>4</sub>), phosphoric acid (H<sub>3</sub>PO<sub>4</sub>), sulfuric acid (H<sub>2</sub>SO<sub>4</sub>) and hydrogen peroxide (H<sub>2</sub>O<sub>2</sub>) were purchased from Sinopharm Chemical Reagent Co., Ltd. (Shanghai, China). Microfluidic electrospinning device with syringe pumps and Y-snake microfluidic chip was provided by Nanjing Janus New Materials Co., Ltd.

### Preparation of rGO-BCN:

0.25 g ultra-pure boron powder, 5 g urea and 0.25 g glucose were uniformly mixed and dried at 80 °C for 24 h. The precursors were repeatedly ground for 30 mins to make it uniformly ground. Graphene oxide was prepared by a modified Hummers' method using graphite powder as raw material. 5 g precursor powder was added to 10 mL GO (20 mg mL<sup>-1</sup>) suspension and dried at 60 °C for 24 h. Then, the dried mixture was transferred to a tube furnace and heated according to the heating procedure set by the tube furnace: heating at 550 °C for 3 h under Ar protection flow, then heated at 900 °C for 1 h, and then cooled at room temperature to obtain rGO-BCN (The

yield of BCN is about 9.1%).

#### **Preparation of rGO-BCN fiber membrane electrode:**

0.25 g rGO-BCN was dispersed in 5 g DMF by ultrasonic method. 0.6 g of PAN was dissolved in 5 g of DMF and stirred for 3 h. Two solutions of rGO-BCN/DMF ( $0.7 \text{ mL h}^{-1}$ ) and PAN/DMF ( $0.7 \text{ mL h}^{-1}$ ) were injected into the Y-snake serpentine channel through syringe. A voltage of 18 kV was applied at 2 cm of the needle tip, and the spinning distance of the needle tip was adjusted to 12 cm from the receiver. The spinning was performed at 500 rpm for 5 h to collect the composite nanofiber film. The nanofiber membrane was transferred to a tube furnace and carbonized at  $800 \text{ }^\circ\text{C}$  in Ar for 2 h to obtain a flexible rGO-BCN/carbon film electrode.

#### **Preparation of the FSCs:**

Preparation of electrolyte  $\text{H}_2\text{SO}_4/\text{PVA}$ : 1 g PVA was dissolved in 10 mL  $\text{H}_2\text{O}$ , and heated at  $85 \text{ }^\circ\text{C}$  and stirred for 3 h. Then, 1 g  $\text{H}_2\text{SO}_4$  (98 wt%) was dropped into the above solution and further reacted for 1 h.

Then, the above solution was evenly dropped on the glass slide and dried at room temperature to obtain a  $\text{H}_2\text{SO}_4/\text{PVA}$  gel electrolyte membrane which was subsequently placed between the two fiber membrane electrodes and hot pressed at  $60 \text{ }^\circ\text{C}$  for 24 h to obtain FSCs.

#### **Electrochemical measurements:**

Cyclic voltammetry (CV), galvanostatic charge-discharge (GCD) and electrochemical impedance spectroscopy (EIS) tests were performed using a CHI760E electrochemical workstation. The calculation formula of mass specific capacitance is:  $C_m = (4 \times I \times \Delta t) / (m \times \Delta V)$ . Among them,  $I$  (A),  $\Delta t$  (s),  $m$  (g),  $\Delta V$  (V) are the discharge current, the discharge time, the mass of the two fiber electrodes and the voltage range, respectively. The calculation formula of power and energy density is as follows:  $E = CV^2/8$ ,  $P = E \Delta t$ , where  $C$ ,  $V$ ,  $\Delta t$  are specific mass capacitance, working voltage and discharge time, respectively.

## Supplementary Figures

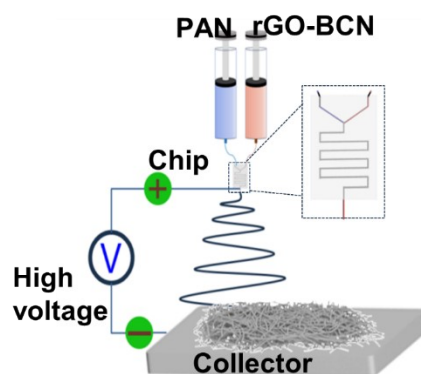

**Fig. S1** The preparation of rGO-BCN fiber membrane through MES.

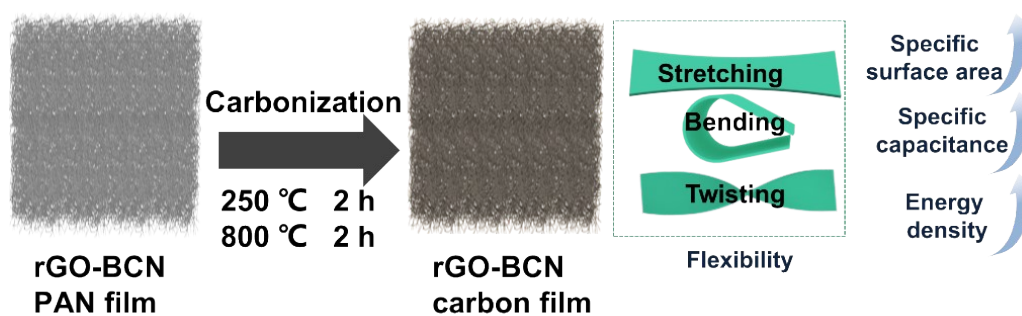

**Fig. S2** The carbonization of rGO-BCN fiber membrane.

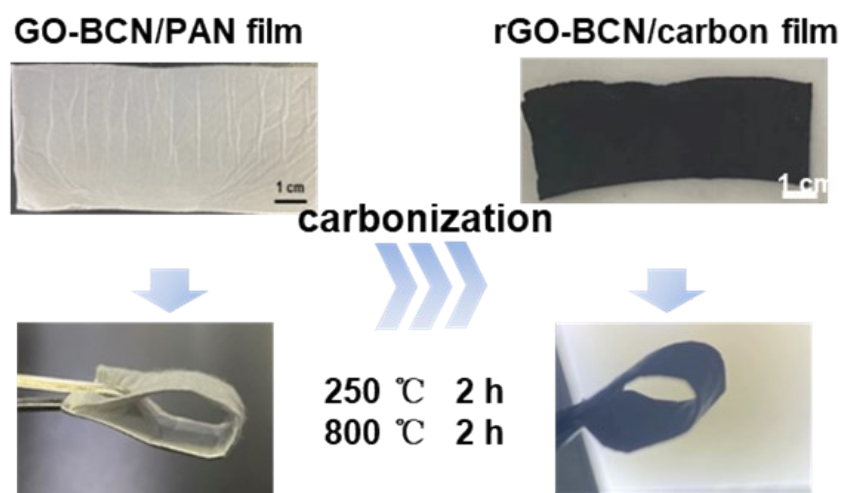

**Fig. S3** Photographs of rGO-BCN/PAN film before and after carbonization.

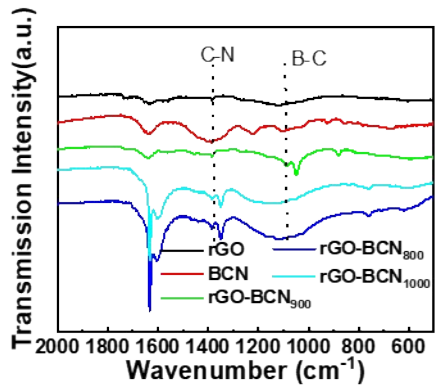

**Fig. S4** FTIR spectra of rGO, BCN, rGO-BCN<sub>800</sub>, rGO-BCN<sub>900</sub> and rGO-BCN<sub>1000</sub>.

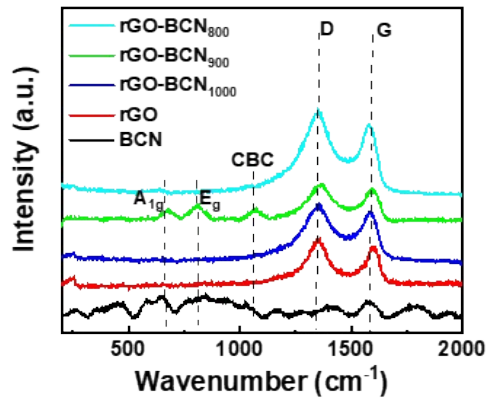

**Fig. S5** Raman spectra of rGO, BCN, rGO-BCN<sub>800</sub>, rGO-BCN<sub>900</sub> and rGO-BCN<sub>1000</sub>.

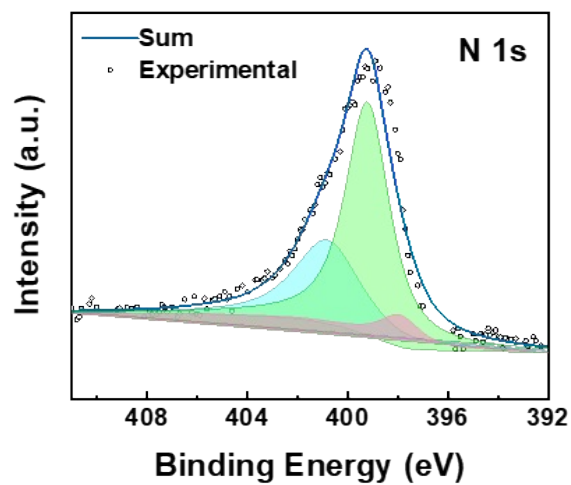

**Fig. S6** N 1s spectra of rGO-BCN.

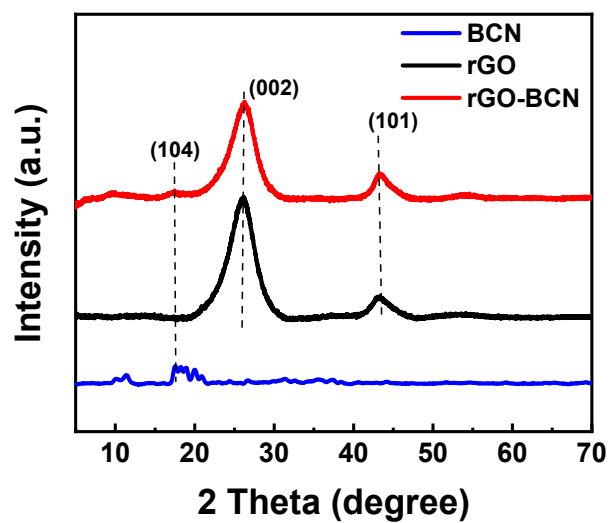

Fig. S7 XRD patterns of rGO, BCN and rGO-BCN.

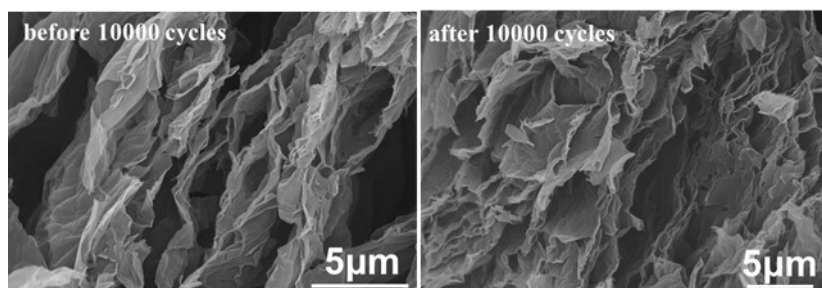

Fig. S8 SEM images of rGO-BCN before and after 10,000 cycles.

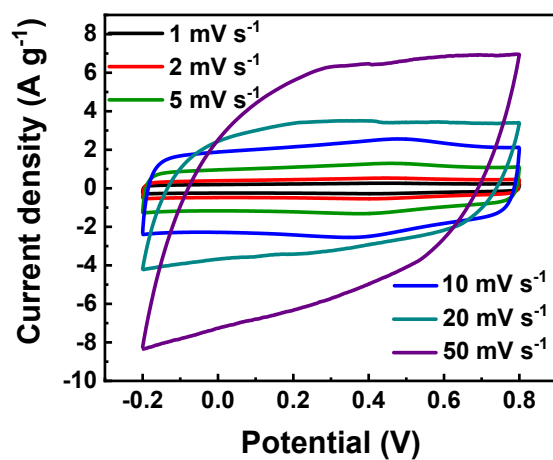

Fig. S9 CV curves of the rGO-BCN<sub>1/4</sub> fiber membrane at scan rates from 1 to 50 mV s<sup>-1</sup>.

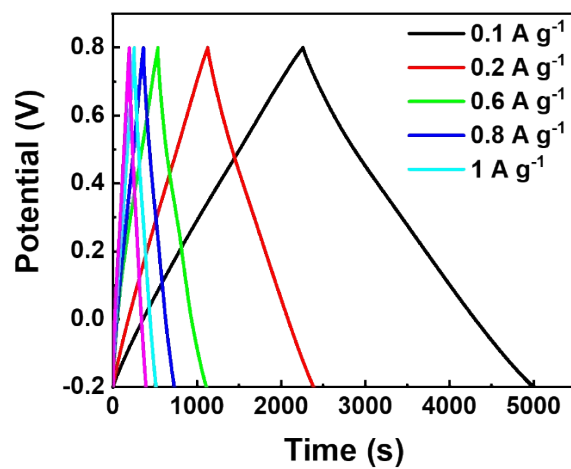

**Fig. S10** GCD curves of rGO-BCN<sub>1/4</sub> fiber membrane at the current density from 0.1 to 1 A g<sup>-1</sup>.

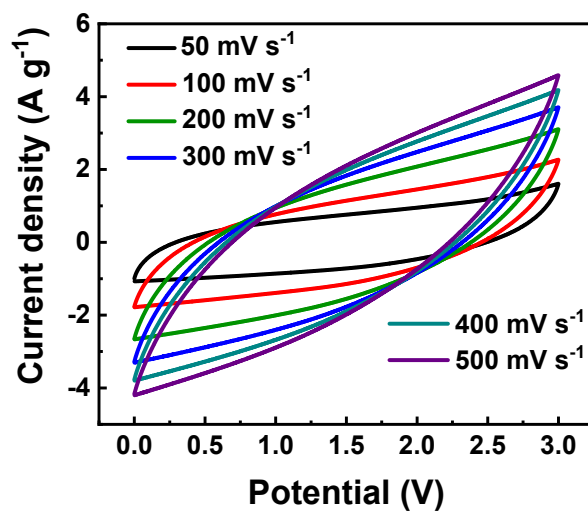

**Fig. S11** CV curves of the FSCs at scan rate from 50 to 500 mV s<sup>-1</sup>.

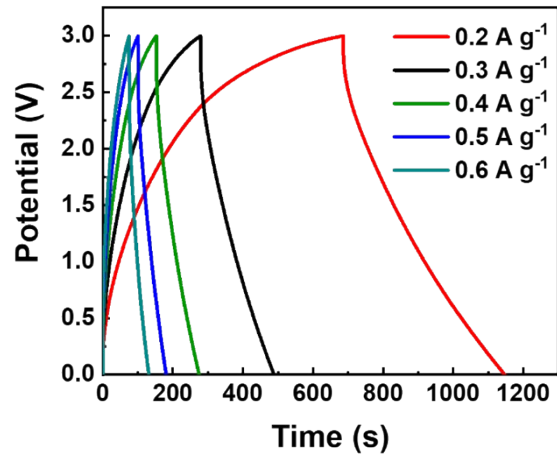

**Fig. S12** GCD curves of FSCs at the current density from 0.2 to 0.6  $\text{A g}^{-1}$ .

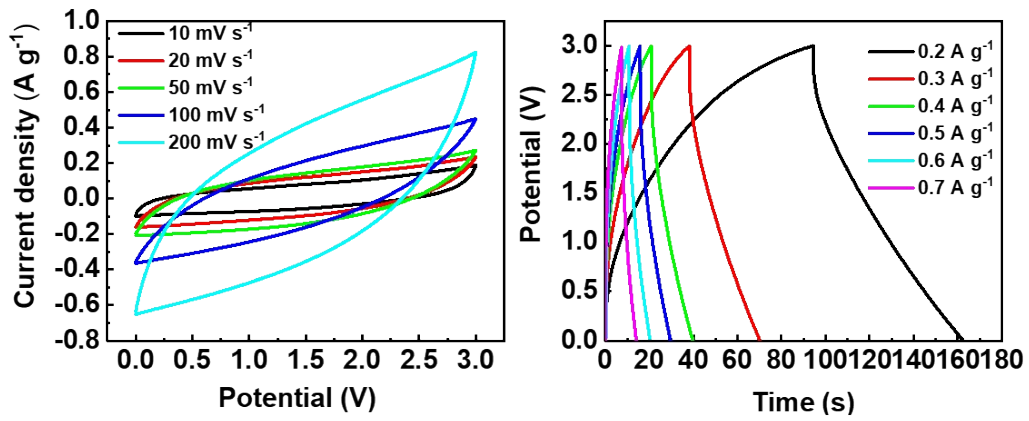

**Fig. S13** CV curves of the FSC of rGO at scan rate of 10-200  $\text{mV s}^{-1}$  and GCD curves of the FSC of rGO at the current density of 0.2-0.7  $\text{A g}^{-1}$ .
